# Supplementary material for: Mechanisms of spontaneous chain formation and subsequent microstructural evolution in shear-driven strongly confined drop monolayers
Source: Royal Society of Chemistry journal article supplement (doi:10.1039/c9sm00536f), 2019-01-01
Supplement: c9sm00536f9.pdf [file c9sm00536f9.pdf]

## Supplementary Material for “Mechanisms of spontaneous chain formation and subsequent microstructural evolution in shear-driven strongly confined drop monolayers”

Sagnik Singha,<sup>a</sup> Abhilash Reddy Malipeddi,<sup>b</sup> Mauricio Zurita-Gotor,<sup>c</sup> Kausik Sarkar,<sup>b</sup>  
Kevin Shen,<sup>d</sup> Michael Loewenberg,<sup>d</sup> Kalman Migler,<sup>e</sup> and Jerzy Blawdziewicz<sup>a,f</sup>

<sup>a</sup>Department of Mechanical Engineering, Texas Tech University, Box 41021, Lubbock, TX 79409, USA. E-mail: jerzy.blawdziewicz@ttu.edu

<sup>b</sup>Department of Mechanical and Aerospace Engineering, George Washington University, Washington, DC 20052, USA

<sup>c</sup>Universidad Loyola Andalucía, Departamento de Ingeniería, Calle Energía Solar 1, 41014 Seville, Spain

<sup>d</sup>Department of Chemical and Environmental Engineering, Yale University, New Haven, USA

<sup>e</sup>Materials Science and Engineering Division, National Institute of Standards and Technology, Gaithersburg, Maryland 2089, USA

<sup>f</sup>Department of Physics and Astronomy, Texas Tech University, Box 41051, Lubbock, TX 79409, USA

### Movies

- **Movie M1** – Benchmark FD/FT simulation for area fraction  $\phi_A = 0.05$  and system size  $N = 76$  particles.
- **Movie M2** – Benchmark FD/FT simulation for area fraction  $\phi_A = 0.3$  and system size  $N = 456$  particles.
- **Movie M3** – Prediction of the QI+STR model for the evolution of the benchmark system of  $N = 76$  particles at the area fraction  $\phi_A = 0.05$  with the same initial configuration as the system shown in **Movie M1**. Time  $t' = t/\varepsilon$  is rescaled by a factor  $\varepsilon = 0.6$ .
- **Movie M4** – Prediction of the QI+STR model for the evolution of the benchmark system of  $N = 456$  particles at the area fraction  $\phi_A = 0.3$  with the same initial configuration as the system shown in **Movie M1**. Time  $t' = t/\varepsilon$  is rescaled by a factor  $\varepsilon = 0.2$ .
- **Movie M5** – Prediction of the QI+STR model for a system of  $N = 512$  particles at the area fraction  $\phi_A = 0.05$ . The movie has been accelerated for  $\gamma t > 200$  to show the long-time evolution.
- **Movie M6** – Prediction of the QI+STR model for a system of  $N = 512$  particles at the area fraction  $\phi_A = 0.15$ . The movie has been accelerated for  $\gamma t > 200$  to show the long-time evolution.
- **Movie M7** – Prediction of the QI+STR model for a system of  $N = 512$  particles at the area fraction  $\phi_A = 0.3$ . The movie has been accelerated for  $\gamma t > 200$  to show the long-time evolution.
- **Movie M8** – Evolution of a hypothetical system with particles interacting via hydrodynamic Hele–Shaw quadrupolar interactions and soft isotropic repulsion of the range  $l_{st}$  for the area fraction  $\phi_A = 0.3$  and system size  $N = 456$  particles. The movie has been accelerated for  $\gamma t > 200$  to show the long-time evolution.
